# Supplementary material for: An endometrial gene expression signature accurately predicts recurrent implantation failure after IVF
Source: PubMed Central journal article supplement (PMC4726345; doi:10.1038/srep19411), 2016-01-22
Supplement: srep19411-s1.pdf [file srep19411-s1.pdf]

## Supplementary Information

### **An endometrial gene expression signature accurately predicts recurrent implantation failure after IVF.**

Yvonne E.M. Koot<sup>1,6</sup>, Sander R. van Hooff<sup>2,6</sup>, Carolien M. Boomsma<sup>1</sup>, Dik van Leenen<sup>2</sup>, Marian J.A. Groot Koerkamp<sup>2</sup>, Mariëtte Goddijn<sup>3</sup>, Marinus J.C. Eijkemans<sup>1,4</sup>, Bart C.J.M. Fauser<sup>1</sup>, Frank C.P. Holstege<sup>2,7,\*</sup>, Nick S. Macklon<sup>1,5,7,\*</sup>

<sup>1</sup>Department of Reproductive Medicine and Gynaecology, University Medical Center Utrecht, Utrecht, The Netherlands. <sup>2</sup>Molecular Cancer Research, University Medical Center Utrecht, Utrecht, The Netherlands. <sup>3</sup>Center for Reproductive Medicine, Academic Medical Center, University of Amsterdam, Amsterdam, The Netherlands. <sup>4</sup>Julius Center for Health Sciences and Primary Care, University Medical Center Utrecht, Utrecht, The Netherlands. <sup>5</sup>Human Development and Health, Faculty of Medicine, University of Southampton, Southampton, United Kingdom. <sup>6</sup>These authors contributed equally to this work. <sup>7</sup>These authors contributed equally to this work.

Corresponding authors:

Nick Macklon, Email: [n.s.macklon@soton.ac.uk](mailto:n.s.macklon@soton.ac.uk)

Frank Holstege, Email: [f.c.p.holstege@umcutrecht.nl](mailto:f.c.p.holstege@umcutrecht.nl)

## Supplementary Figure 1

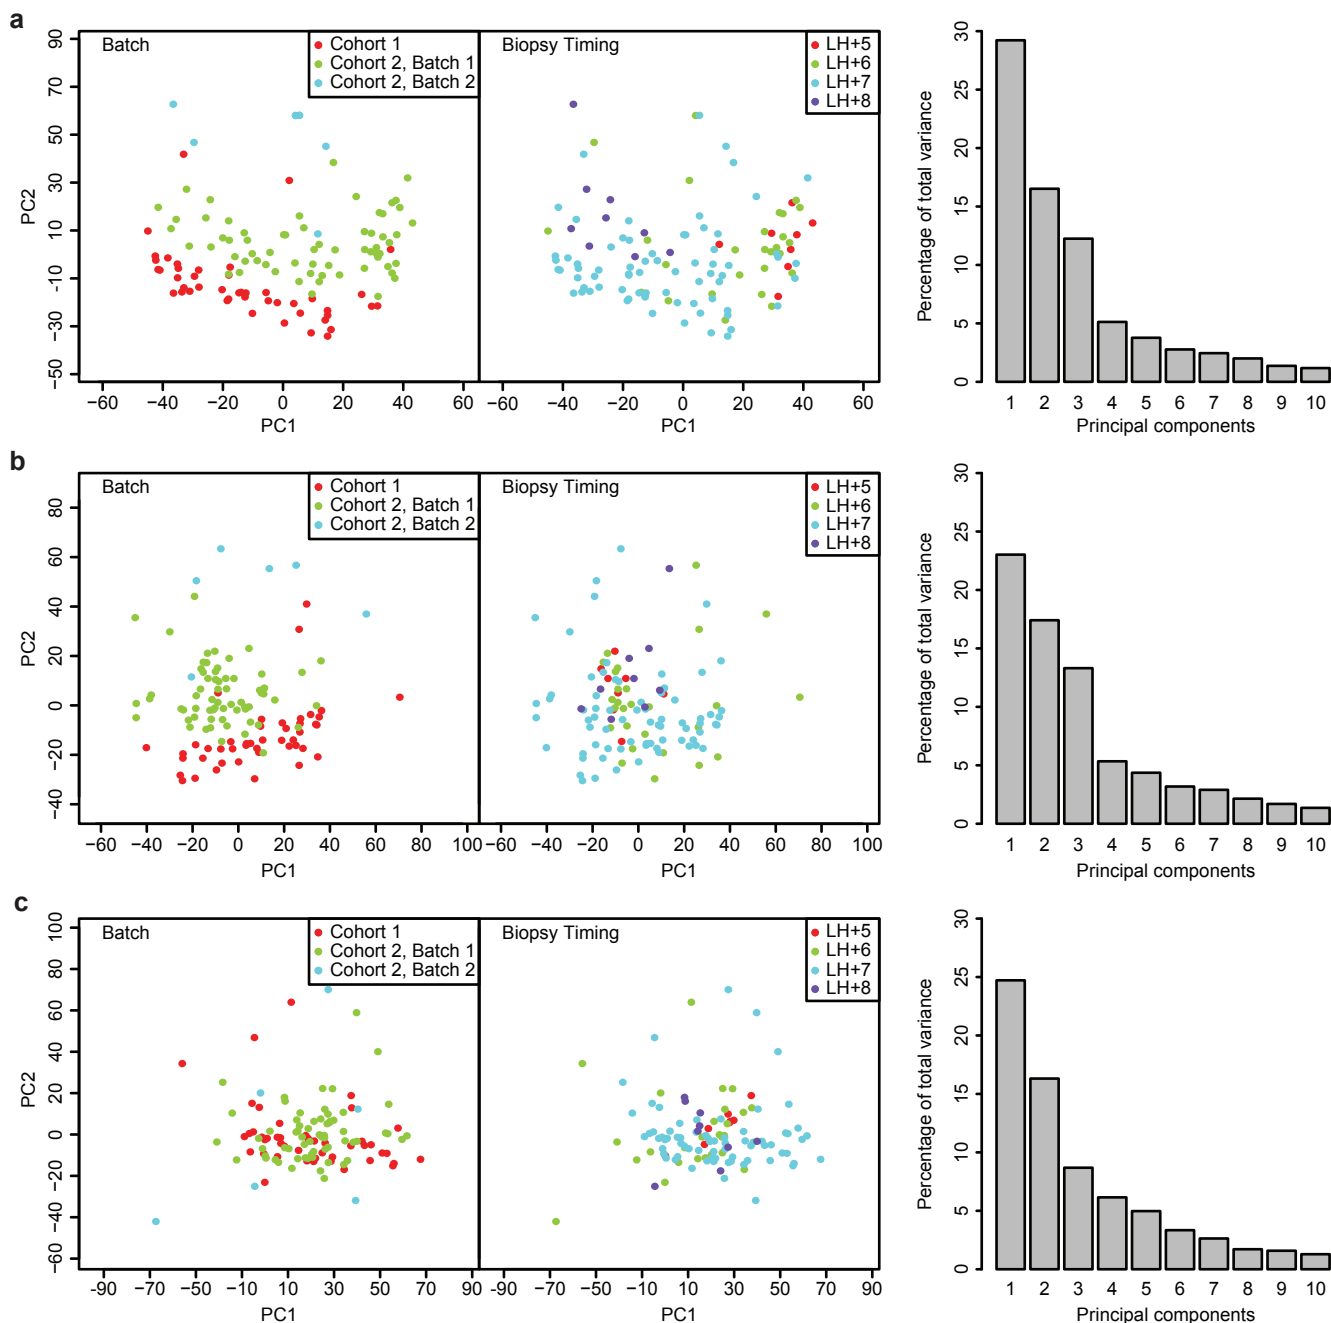

**Supplementary Figure 1. Correction of biopsy timing and batch effect.** A shows PCA plots for the uncorrected profiles of all samples ( $n=115$ ) with batches (left) and biopsy timing (middle) superimposed. The right plot shows the amount of variation in the data explained by each of the first ten principal components. B shows the same plots but after correcting for the biopsy timing effect. C shows the results after also correcting for the batch effect.

## Supplementary Figure 2

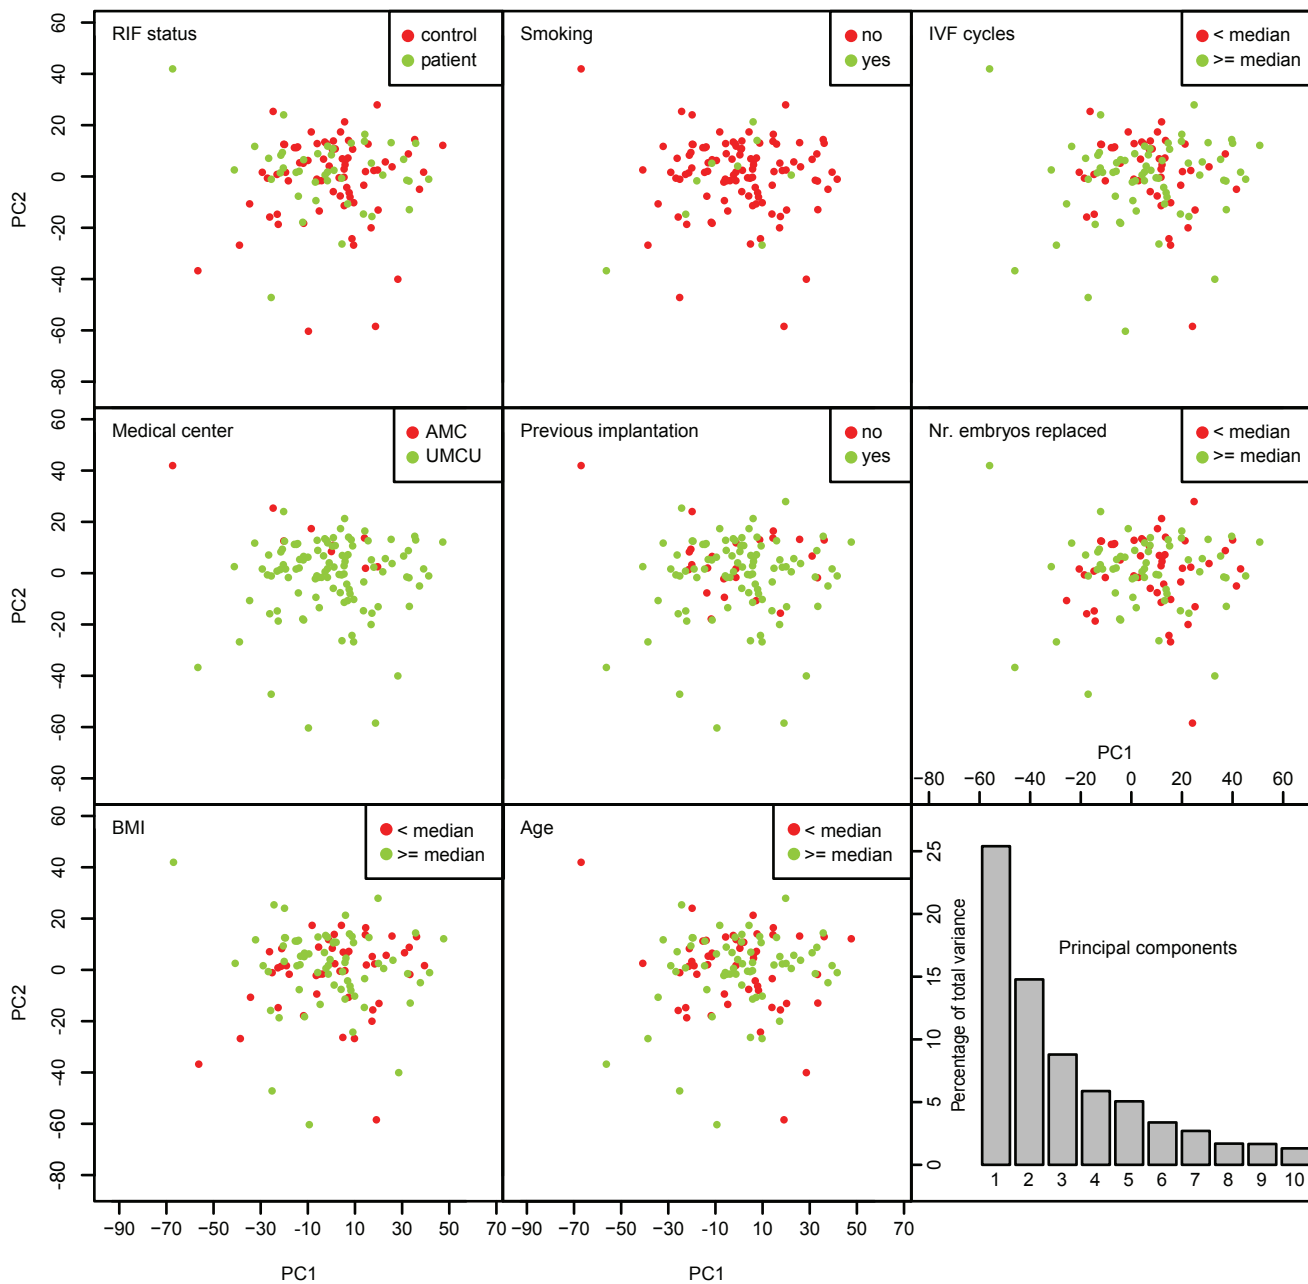

**Supplementary Figure 2. PCA plots with patient characteristics and treatment variables.** This figure shows PCA plots with 8 different patient characteristics and treatment variables superimposed. Continuous variables were dichotomized into below and above/equal to median value. The lower right plot shows the amount of variation in the data that is explained by each of the first ten principal components.

Supplementary Figure 3

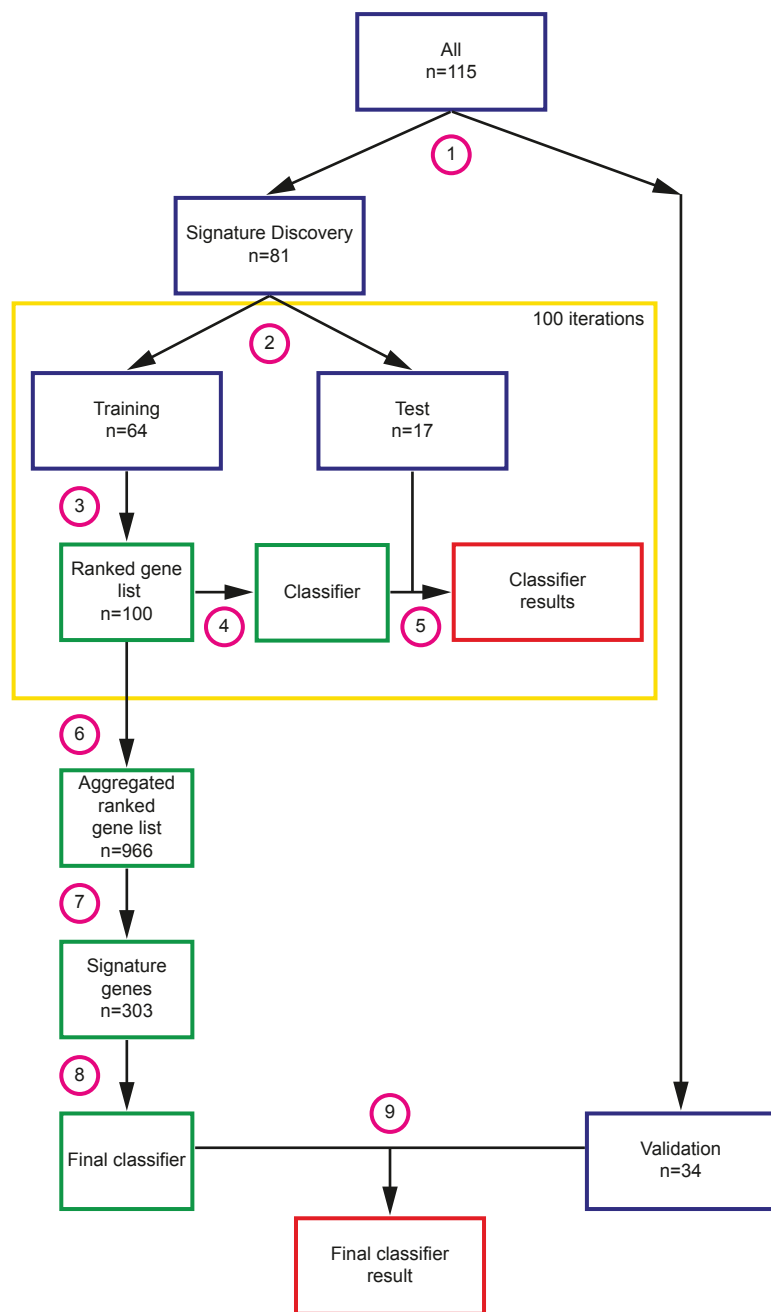

**Supplementary Figure 3. Signature discovery algorithm.** Diagram depicting the data used (blue boxes), analyses performed (numbered circles), output generated (green boxes) and performance measured (red boxes) during signature discovery and validation. In the first step the data is split between a signature discovery set and a validation set, step 2 involves splitting the signature discovery set into a training and test set. The training data is used to identify the 100 genes that best distinguish between RIF patient and controls (step 3). These 100 genes are employed to build a SVM classifier (step 4) which then attempts to predict the class of the samples in the test set (step 5). Step 2 to 5 are repeated 100 times which results in 100 separate 100-gene lists. These 100 lists are combined in a single list which is ranked by the occurrence of individual genes in the 100 lists (step 6). All genes which occur 10 times or more are included in the final signature (step 7) which is used to build a SVM classifier (step 8). The ninth and last step is to use the final classifier to classify the samples in the validation set.

## Supplementary Figure 4

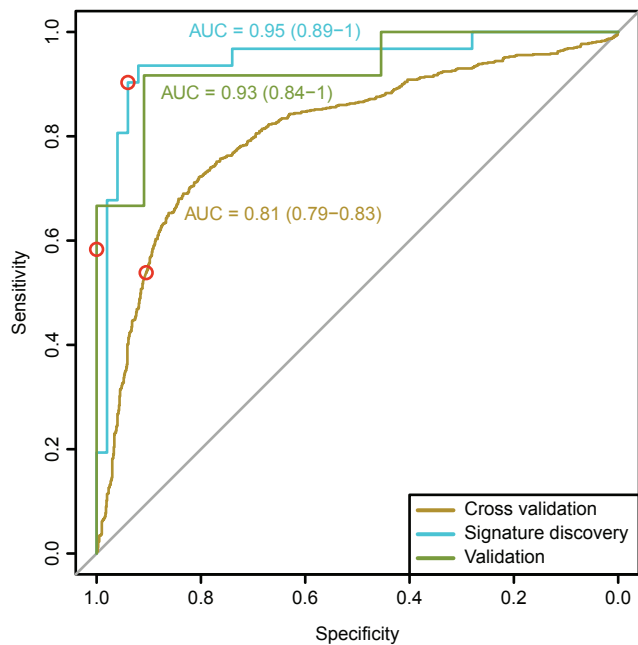

**Supplementary Figure 4. Classifier ROC curves.** This figure shows ROC curves for classifier performance. It is similar to Fig. 1C (blue and green curves) with an extra curve added (yellow) for the results of the 100 iterations of the cross validation procedure during signature discovery (step 5 in Supplementary Fig. S3). The Area Under the Curve (AUC) with the 95% CI is shown next to the curves. The dots indicate the point of the ROC curve that corresponds with the actual threshold used for classification (0.5).

## Supplementary Figure 5

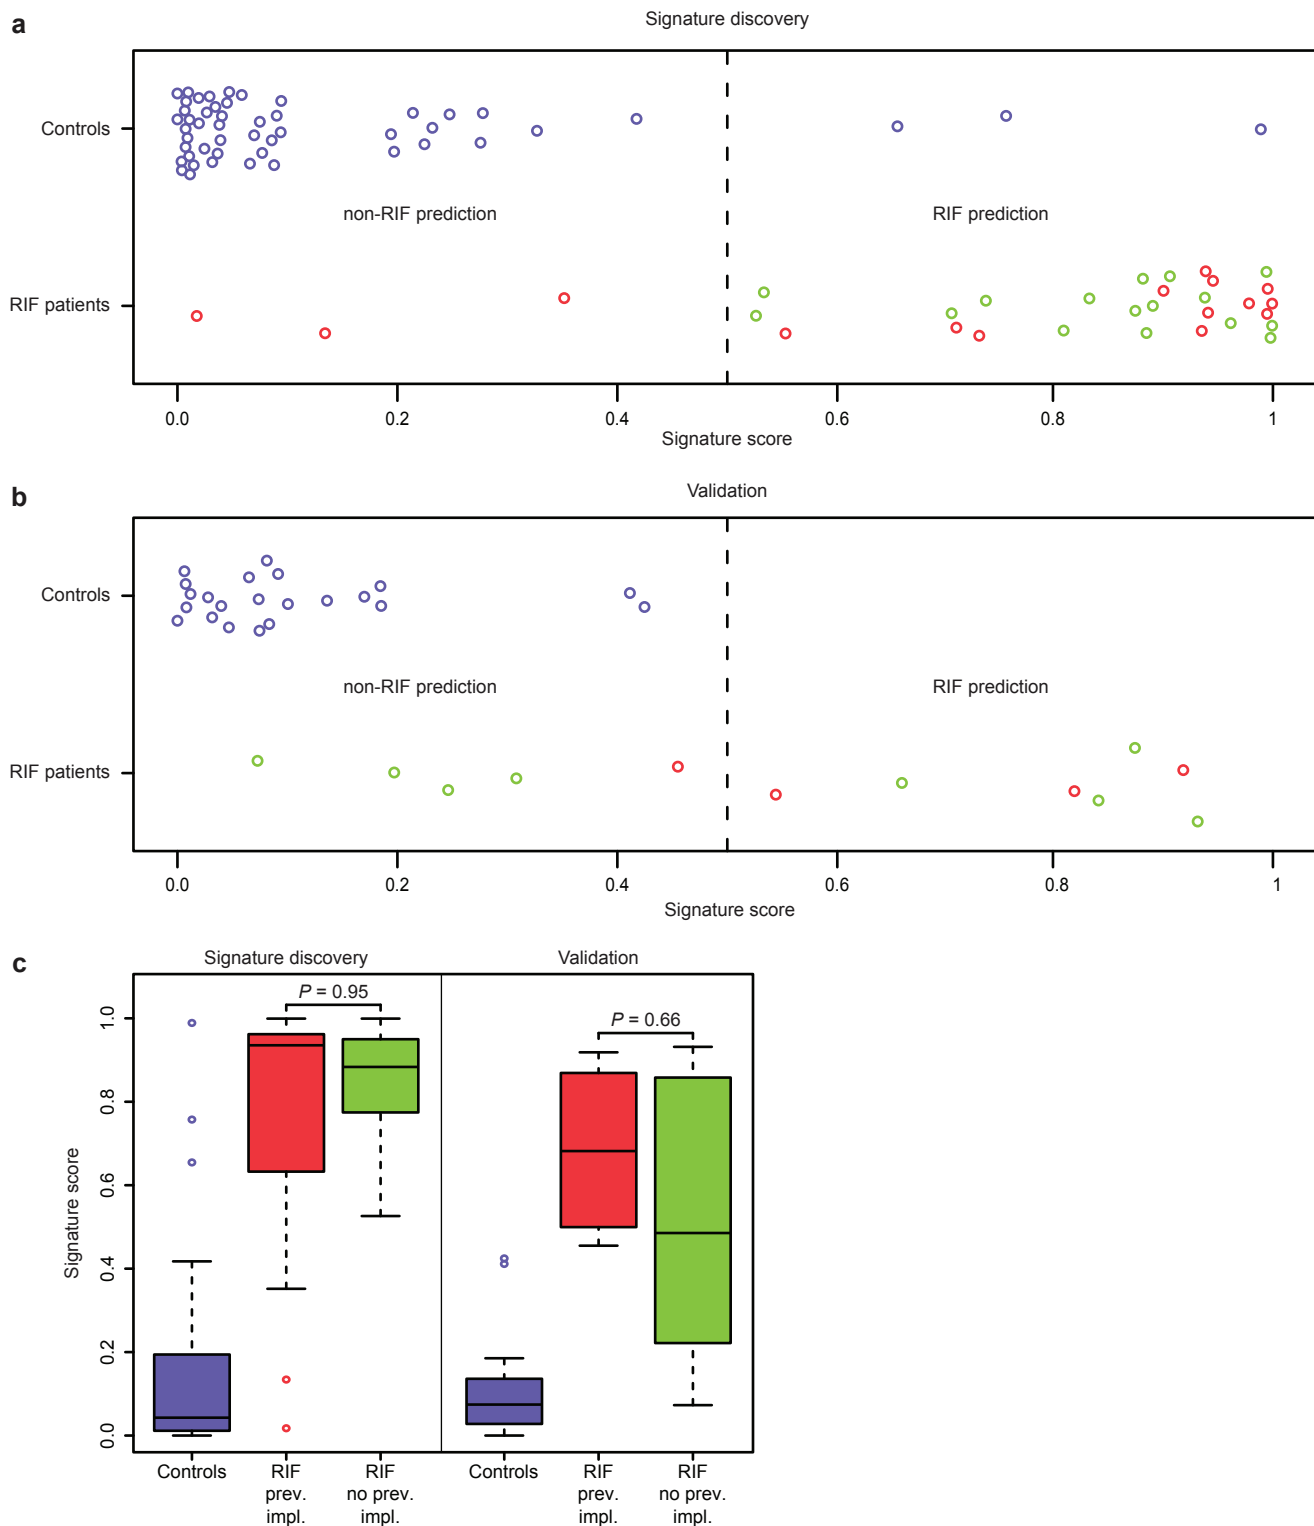

**Supplementary Figure 5. Impact of previous implantation events on classifier outcome.** This figure is similar to Figs. 1A and B, additionally dividing RIF patients into those with an implantation event prior to the endometrial biopsy and those without. A shows the signature scores for all RIF patients with previous implantation (red) and without previous implantation (green) and controls (blue). The signature scores are based on a classifier trained on all samples in the signature discovery set with the exception of the sample that is predicted (leave one out cross validation). All samples with a signature score below 0.5 are predicted to be controls, those with a signature score of 0.5 or higher are predicted to be RIF patients (the threshold is shown as a dotted line). B is similar to A. The samples shown are from the validation set which were scored based on a classifier trained on all samples in the signature discovery set. C shows boxplots of the signature scores of three groups; controls (blue), RIF patients with (red) and without previous implantation (green).  $P$  was calculated with a two-sided Mann-Whitney test.

## Supplementary Figure 6

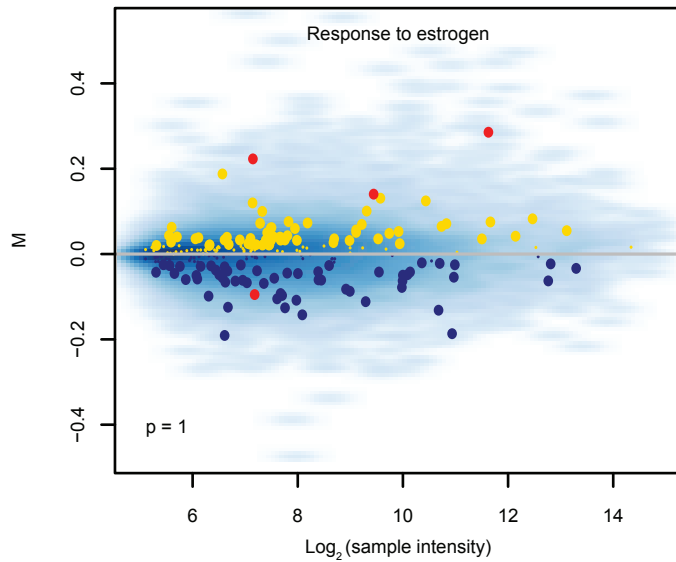

**Supplementary Figure 6. Estrogen response enrichment analysis.** This figure shows the gene expression of RIF patients compared against controls (log<sub>2</sub> fold change or M) and the average expression across all samples (log<sub>2</sub> sample intensity). Genes in the GO term 'response to estrogen' (GO:0043627) which are up-regulated in RIF patients are shown in yellow, genes down-regulated in blue. Shown in red are the genes which are also part of the 303-gene signature. Genes that are not part of the GO term are shown as a blue density map where darker blue indicates higher gene density.

# Supplementary Figure 7

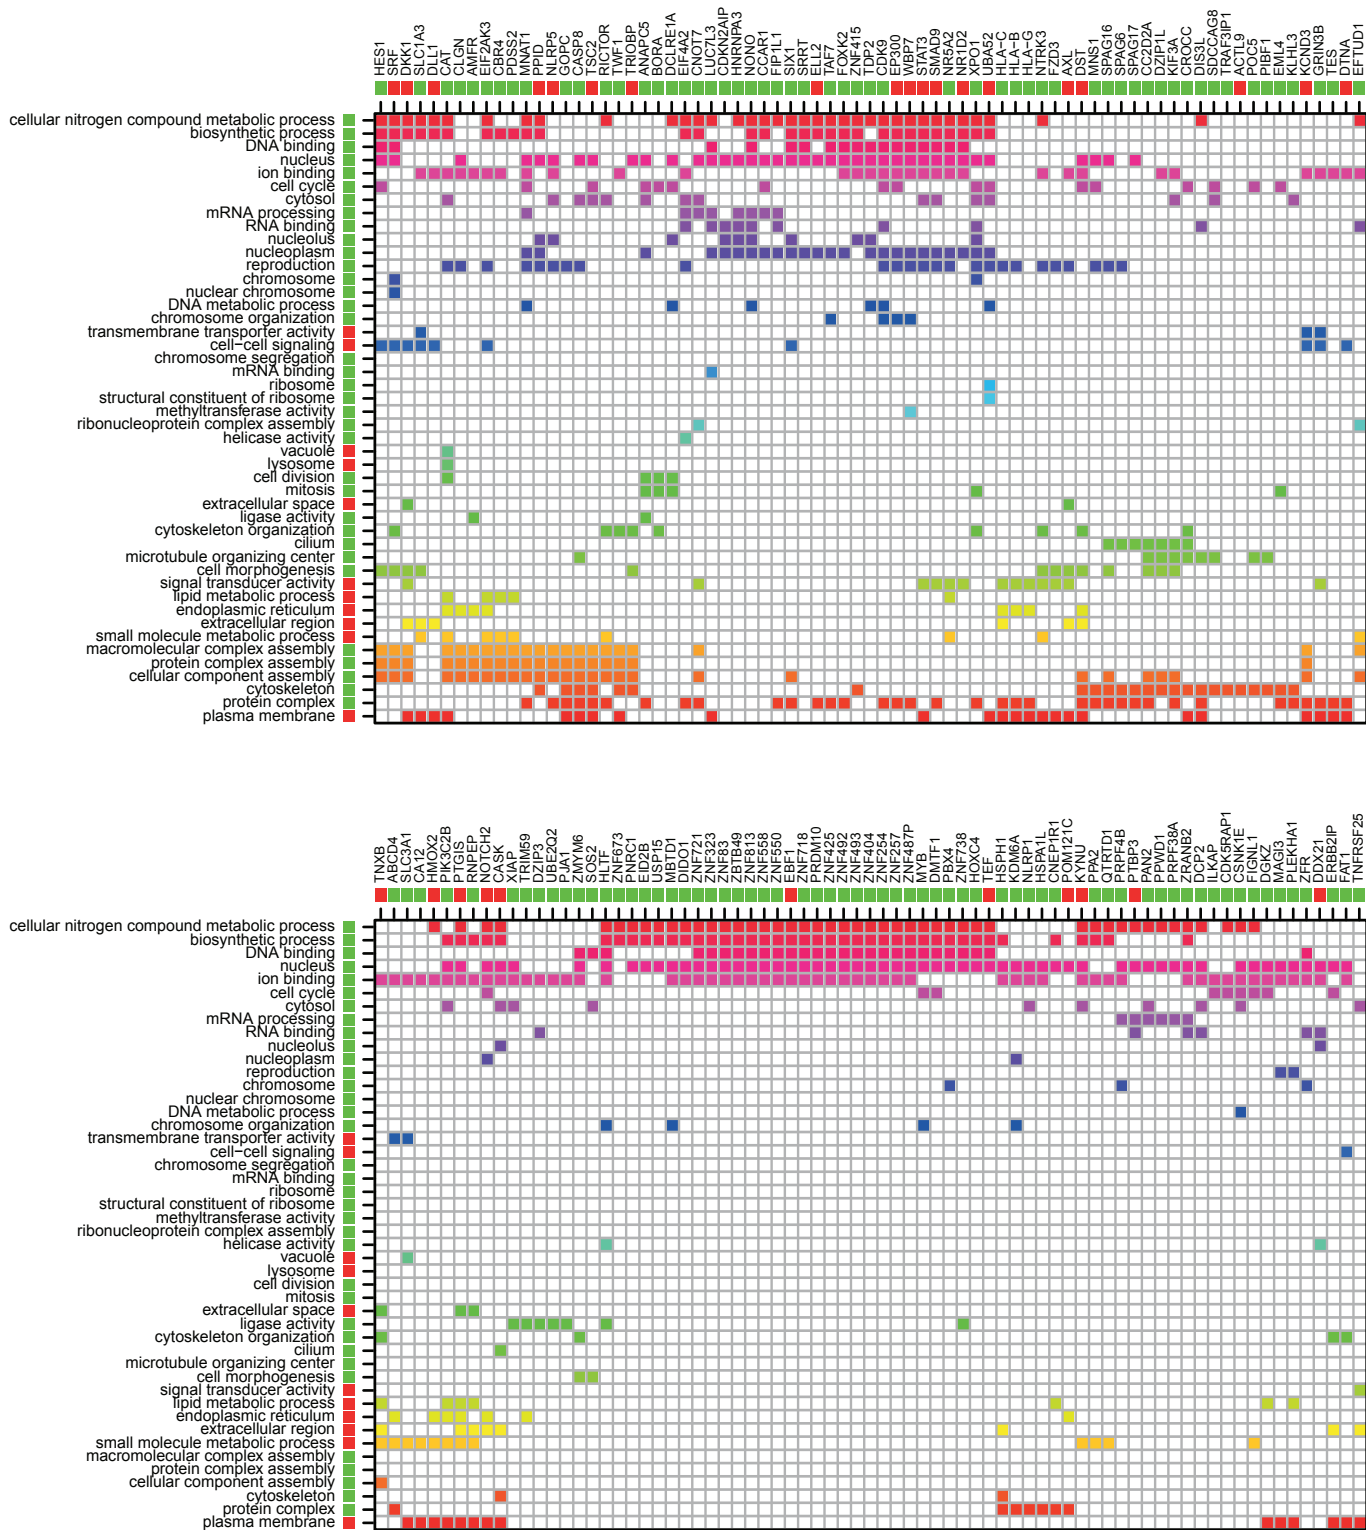

**Supplementary Figure 7. Functional characterisation 303-gene signature.** This figure is similar to Fig. 2E but now showing all signature genes (n=296) present in the GO database.



Supplementary Figure 7 continued

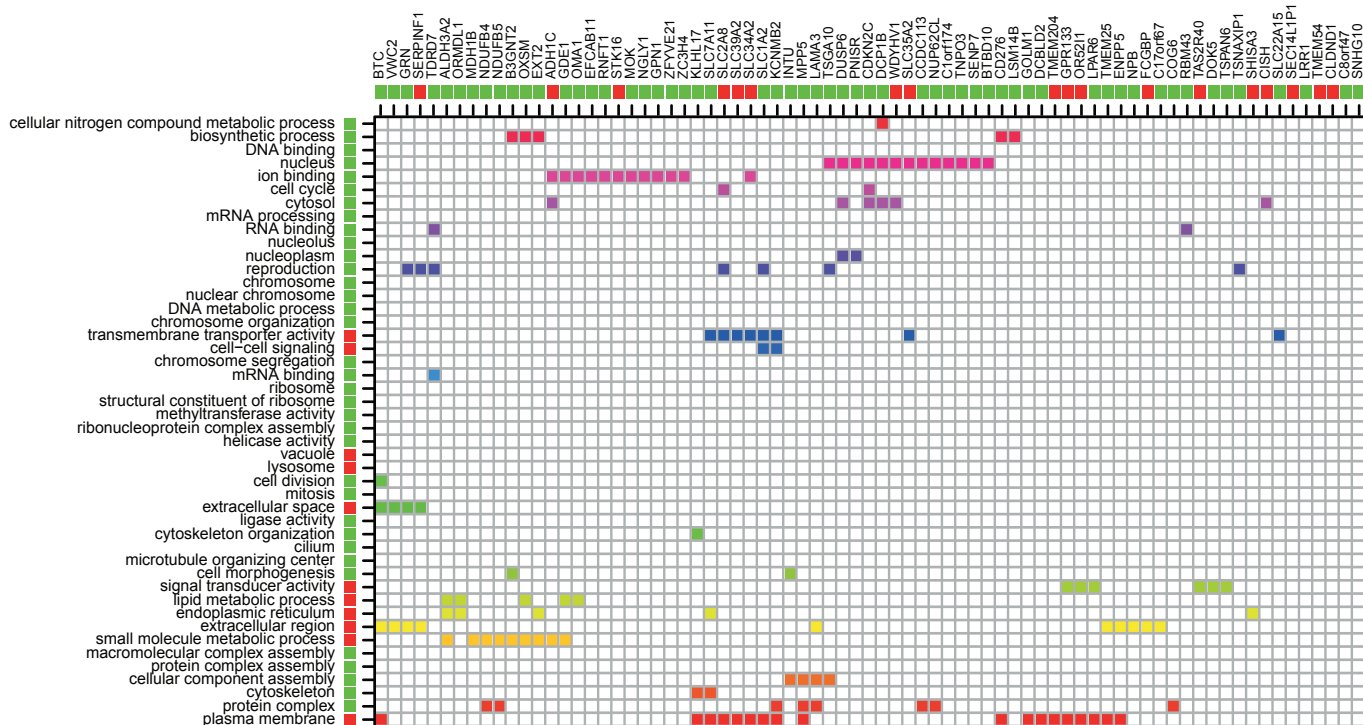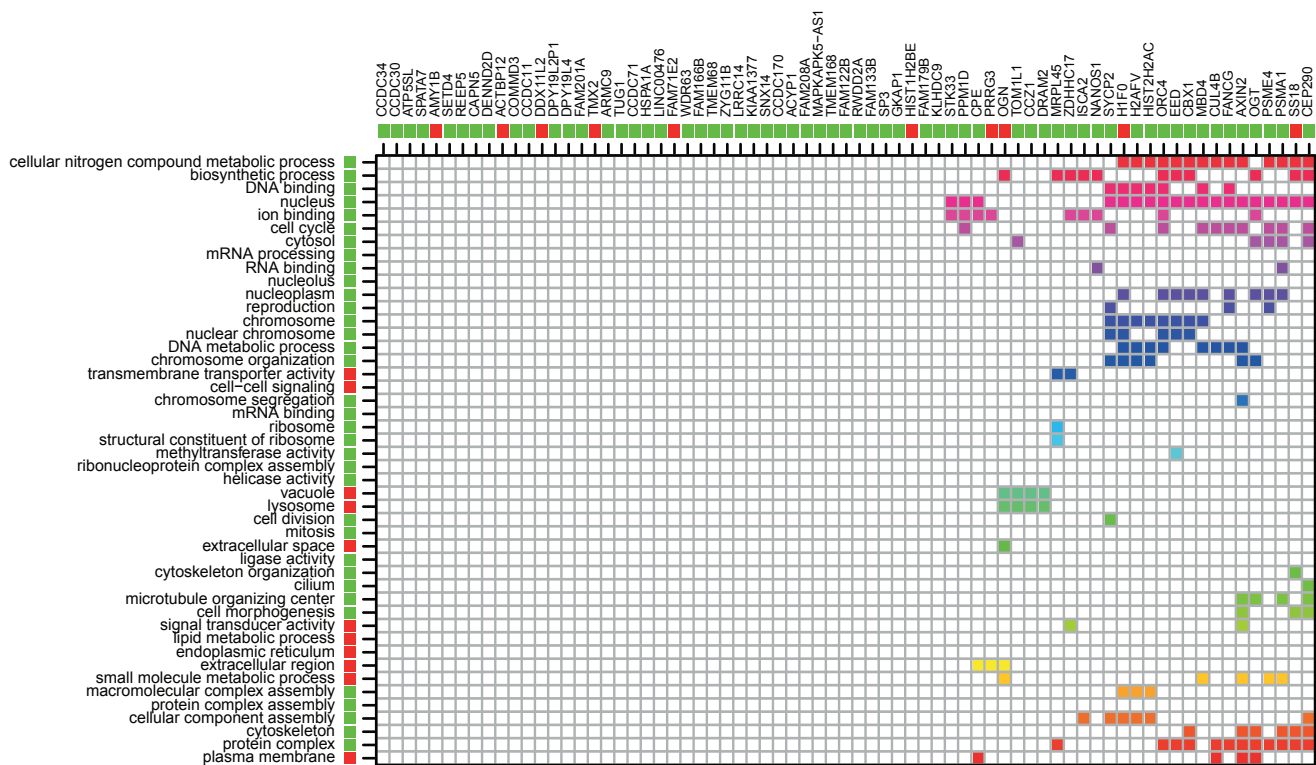

**TableS1.** PCA of biopsy timing and batch effect corrections

| <b>(A) Before correction</b>                  |                        |                         |                        |            |
|-----------------------------------------------|------------------------|-------------------------|------------------------|------------|
|                                               | <i>P</i>               |                         |                        |            |
|                                               | <b>PC1</b>             | <b>PC2</b>              | <b>PC3</b>             | <b>PC4</b> |
| <b>Biopsy timing</b>                          |                        |                         |                        |            |
| LH+5                                          | 4.2 X 10 <sup>-5</sup> | 0.178                   | 0.382                  | 0.047      |
| LH+6                                          | 2.0 x 10 <sup>-5</sup> | 0.157                   | 0.623                  | 0.490      |
| LH+7                                          | 4.2 x 10 <sup>-5</sup> | 3.4 x 10 <sup>-4</sup>  | 0.058                  | 0.016      |
| LH+8                                          | 0.003                  | 0.003                   | 0.069                  | 0.171      |
| <b>Batch</b>                                  |                        |                         |                        |            |
| Cohort 1                                      | 4.2 x 10 <sup>-5</sup> | 9.7 x 10 <sup>-12</sup> | 1.3 x 10 <sup>-7</sup> | 0.866      |
| Cohort 2, Batch 1                             | 2.0 x 10 <sup>-5</sup> | 6.2 x 10 <sup>-7</sup>  | 2.0 x 10 <sup>-8</sup> | 0.403      |
| Cohort 2, Batch 2                             | 0.593                  | 1.4 x 10 <sup>-4</sup>  | 0.342                  | 0.136      |
| <b>(B) After correction for biopsy timing</b> |                        |                         |                        |            |
| <b>Biopsy timing</b>                          |                        |                         |                        |            |
| LH+5                                          | 0.320                  | 0.072                   | 0.779                  | 0.342      |
| LH+6                                          | 0.091                  | 0.591                   | 0.546                  | 0.825      |
| LH+7                                          | 0.432                  | 0.006                   | 0.110                  | 0.399      |
| LH+8                                          | 0.767                  | 0.016                   | 0.097                  | 0.330      |
| <b>Batch</b>                                  |                        |                         |                        |            |
| Cohort 1                                      | 3.0 x 10 <sup>-4</sup> | 1.4 x 10 <sup>-12</sup> | 5.1 x 10 <sup>-7</sup> | 0.306      |
| Cohort 2, Batch 1                             | 1.6 x 10 <sup>-4</sup> | 1.7 x 10 <sup>-7</sup>  | 1.0 x 10 <sup>-7</sup> | 0.086      |
| Cohort 2, Batch 2                             | 0.628                  | 1.2 x 10 <sup>-4</sup>  | 0.389                  | 0.114      |
| <b>(C) After correction for batch</b>         |                        |                         |                        |            |
| <b>Biopsy timing</b>                          |                        |                         |                        |            |
| LH+5                                          | 0.407                  | 0.081                   | 0.438                  | 0.520      |
| LH+6                                          | 0.079                  | 0.815                   | 0.002                  | 0.699      |
| LH+7                                          | 0.137                  | 0.158                   | 0.098                  | 0.263      |
| LH+8                                          | 0.482                  | 0.599                   | 0.286                  | 0.426      |
| <b>Batch</b>                                  |                        |                         |                        |            |
| Cohort 1                                      | 0.580                  | 0.175                   | 0.938                  | 0.588      |
| Cohort 2, Batch 1                             | 0.426                  | 0.144                   | 0.763                  | 0.575      |
| Cohort 2, Batch 2                             | 0.576                  | 0.777                   | 0.619                  | 0.955      |

*P* was calculated using a two-sided Mann-Whitney test contrasting the PC values of samples with a particular variable value against the rest (i.e. PC1 values of LH+5 vs. LH+6/7/8); PC1-4, principal component 1-4; LH+X, biopsy was taken X days after luteinizing hormone (LH) surge.

**TableS2.** Variable association with principal components

| Variables                     | <i>P</i> |       |       |       |
|-------------------------------|----------|-------|-------|-------|
|                               | PC1      | PC2   | PC3   | PC4   |
| RIF status (patient/control)  | 0.577    | 0.692 | 0.561 | 0.209 |
| Medical center (UMCU/AMC)     | 0.556    | 0.002 | 0.606 | 0.979 |
| BMI (median)                  | 0.349    | 0.315 | 0.507 | 0.157 |
| Smoking (yes/no)              | 0.571    | 0.549 | 0.760 | 0.744 |
| Implantations (median)        | 0.618    | 0.183 | 0.855 | 0.910 |
| Age (median)                  | 0.768    | 0.913 | 0.750 | 0.953 |
| IVF cycles (median)           | 0.845    | 0.233 | 0.468 | 0.292 |
| Nr. embryos replaced (median) | 0.430    | 0.791 | 0.949 | 0.313 |

*P* was calculated using a two-sided Mann-Whitney test contrasting the PC values of one group against the other group (i.e. PC1 values of smokers vs. non-smokers); PC1-4, principal component 1-4; Median, the median value was used to dichotomize the covariates (< median & ≥ median); BMI, body mass index.

**Table S3.** Signature genes

| Probe ID   | Gene symbol   | Description                                                                                  | M     |
|------------|---------------|----------------------------------------------------------------------------------------------|-------|
| HSAE000532 | PPWD1         | peptidylprolyl isomerase domain and WD repeat containing 1                                   | -0.19 |
| HSAE022203 | POC5          | POC5 centriolar protein homolog (Chlamydomonas)                                              | -0.17 |
| HSAE022471 | CSNK1E        | casein kinase 1, epsilon                                                                     | -0.12 |
| HSAE019770 | FAM179B       | family with sequence similarity 179, member B                                                | -0.19 |
| HSAE005427 | CPE           | carboxypeptidase E                                                                           | -0.48 |
| HSAE006018 | DCP1B         | DCP1 decapping enzyme homolog B ( <i>S. cerevisiae</i> )                                     | -0.11 |
| HSAE010975 | TAF7          | TAF7 RNA polymerase II, TATA box binding protein (TBP)-associated factor, 55kDa              | -0.15 |
| HSAE014616 | SLC1A2        | solute carrier family 1 (glial high affinity glutamate transporter), member 2                | -0.24 |
| HSAE021377 | MPP5          | membrane protein, palmitoylated 5 (MAGUK p55 subfamily member 5)                             | -0.11 |
| HSAE021192 | OXSM          | 3-oxoacyl-ACP synthase, mitochondrial                                                        | -0.12 |
| HSAE008217 | EP300         | E1A binding protein p300                                                                     | 0.19  |
| HSAE030183 | TNXB          | tenascin XB                                                                                  | 0.12  |
| HSAE011196 | KLHDC9        | kelch domain containing 9                                                                    | -0.15 |
| HSAE007316 | EID2B         | EP300 interacting inhibitor of differentiation 2B                                            | -0.10 |
| HSAE000275 | CAT           | Catalase                                                                                     | -0.17 |
| HSAE020379 | CBR4          | carbonyl reductase 4                                                                         | -0.16 |
| HSAE003961 | TMEM25        | transmembrane protein 25                                                                     | -0.13 |
| HSAE007811 | SLC22A15      | solute carrier family 22, member 15                                                          | -0.11 |
| HSAE002494 | CUL4B         | cullin 4B                                                                                    | -0.12 |
| HSAE004566 | FCGBP         | Fc fragment of IgG binding protein                                                           | 0.14  |
| HSAE012530 | CASP8         | caspase 8, apoptosis-related cysteine peptidase                                              | -0.07 |
| HSAE001942 | OMA1          | OMA1 zinc metallopeptidase homolog ( <i>S. cerevisiae</i> )                                  | -0.11 |
| HSAE014904 | CCZ1          | CCZ1 vacuolar protein trafficking and biogenesis associated homolog ( <i>S. cerevisiae</i> ) | -0.05 |
| HSAE031372 | ZNF257        | zinc finger protein 257                                                                      | -0.13 |
| HSAE002376 | H2AFV         | H2A histone family, member V                                                                 | -0.14 |
| HSAE016014 | CCDC113       | coiled-coil domain containing 113                                                            | -0.20 |
| HSAE032669 | ZNF415        | zinc finger protein 415                                                                      | -0.18 |
| HSAE013562 | ZMYM6         | zinc finger, MYM-type 6                                                                      | -0.12 |
| HSAE015519 | RP1-152L7.5   | RP1-152L7.5                                                                                  | -0.11 |
| HSAE002271 | DZIP3         | DAZ interacting protein 3, zinc finger                                                       | -0.17 |
| HSAE004693 | ZNF673        | zinc finger family member 673                                                                | -0.13 |
| HSAE011062 | TDP2          | tyrosyl-DNA phosphodiesterase 2                                                              | -0.12 |
| HSAE033287 | ZNF487P       | zinc finger protein 487, pseudogene                                                          | -0.15 |
| HSAE020170 | ZNF738        | zinc finger protein 738                                                                      | -0.19 |
| HSAE031067 | KCNMB2        | potassium large conductance calcium-activated channel, subfamily M, beta member 2            | -0.19 |
| HSAE011386 | LAMA3         | laminin, alpha 3                                                                             | -0.25 |
| HSAE026892 | NLRP1         | NLR family, pyrin domain containing 1                                                        | -0.23 |
| HSAE007958 | DIDO1         | death inducer-obliterator 1                                                                  | -0.10 |
| HSAE018217 | RP5-1129J21.3 | RP5-1129J21.3                                                                                | -0.18 |
| HSAE002930 | TNXB          | tenascin XB                                                                                  | 0.11  |
| HSAE023427 | CTD-2116N17.1 | CTD-2116N17.1                                                                                | 0.19  |
| HSAE024971 | HIST1H2BE     | histone cluster 1, H2be                                                                      | 0.09  |
| HSAE022135 | AC007292.6    | AC007292.6                                                                                   | 0.12  |
| HSAE011646 | GKAP1         | G kinase anchoring protein 1                                                                 | -0.17 |
| HSAE006812 | SP3           | Sp3 transcription factor                                                                     | -0.20 |
| HSAE007705 | DZIP1L        | DAZ interacting protein 1-like                                                               | -0.21 |
| HSAE000804 | CCAR1         | cell division cycle and apoptosis regulator 1                                                | -0.10 |
| HSAE016921 | INTU          | inturned planar cell polarity effector homolog ( <i>Drosophila</i> )                         | -0.15 |
| HSAE012539 | FAM133B       | family with sequence similarity 133, member B                                                | -0.10 |
| HSAE013456 | ZRANB2        | zinc finger, RAN-binding domain containing 2                                                 | -0.17 |
| HSAE002193 | ZFYVE21       | zinc finger, FYVE domain containing 21                                                       | -0.10 |
| HSAE021606 | RP11-706O15.3 | RP11-706O15.3                                                                                | -0.07 |

|                   |              |                                                                               |       |
|-------------------|--------------|-------------------------------------------------------------------------------|-------|
| <b>HSAE019450</b> | ZNF254       | zinc finger protein 254                                                       | -0.14 |
| <b>HSAE030937</b> | FOXP2        | forkhead box K2                                                               | -0.06 |
| <b>HSAE002268</b> | CISH         | cytokine inducible SH2-containing protein                                     | 0.22  |
| <b>HSAE012322</b> | DCBLD2       | discoidin, CUB and LCCL domain containing 2                                   | -0.20 |
| <b>HSAE000881</b> | SOS2         | son of sevenless homolog 2 (Drosophila)                                       | -0.10 |
| <b>HSAE001077</b> | EIF4A2       | eukaryotic translation initiation factor 4A2                                  | -0.12 |
| <b>HSAE009803</b> | ELL2         | elongation factor, RNA polymerase II, 2                                       | 0.07  |
| <b>HSAE034109</b> | PPA2         | pyrophosphatase (inorganic) 2                                                 | -0.12 |
| <b>HSAE009179</b> | TWF1         | twinfilin, actin-binding protein, homolog 1 (Drosophila)                      | -0.10 |
| <b>HSAE009528</b> | EED          | embryonic ectoderm development                                                | -0.20 |
| <b>HSAE005215</b> | RWDD2A       | RWD domain containing 2A                                                      | -0.08 |
| <b>HSAE013680</b> | SENP7        | SUMO1/sentrin specific peptidase 7                                            | -0.23 |
| <b>HSAE001761</b> | BTBD10       | BTB (POZ) domain containing 10                                                | -0.06 |
| <b>HSAE032952</b> | TNPO3        | transportin 3                                                                 | -0.03 |
| <b>HSAE012052</b> | KYNU         | kynureninase                                                                  | 0.52  |
| <b>HSAE014369</b> | CA12         | carbonic anhydrase XII                                                        | -0.47 |
| <b>HSAE008008</b> | CNEP1R1      | CTD nuclear envelope phosphatase 1 regulatory subunit 1                       | -0.03 |
| <b>HSAE010272</b> | SPAG16       | sperm associated antigen 16                                                   | -0.11 |
| <b>HSAE015672</b> | C17orf67     | chromosome 17 open reading frame 67                                           | -0.09 |
| <b>HSAE033077</b> | KIF3A        | kinesin family member 3A                                                      | -0.09 |
| <b>HSAE011415</b> | ZNF404       | zinc finger protein 404                                                       | -0.29 |
| <b>HSAE013758</b> | EML4         | echinoderm microtubule associated protein like 4                              | -0.11 |
| <b>HSAE023428</b> | OGN          | osteoglycin                                                                   | 0.21  |
| <b>HSAE008504</b> | ZFR          | zinc finger RNA binding protein                                               | -0.10 |
| <b>HSAE010484</b> | FANCG        | Fanconi anemia, complementation group G                                       | -0.11 |
| <b>HSAE027480</b> | KDM6A        | lysine (K)-specific demethylase 6A                                            | -0.09 |
| <b>HSAE016847</b> | ZNF493       | zinc finger protein 493                                                       | -0.13 |
| <b>HSAE001943</b> | OMA1         | OMA1 zinc metallopeptidase homolog (S. cerevisiae)                            | -0.06 |
| <b>HSAE022240</b> | SLC35A2      | solute carrier family 35 (UDP-galactose transporter), member A2               | 0.14  |
| <b>HSAE005948</b> | MYB          | v-myb myeloblastosis viral oncogene homolog (avian)                           | -0.26 |
| <b>HSAE018195</b> | KCND3        | potassium voltage-gated channel, Shal-related subfamily, member 3             | 0.09  |
| <b>HSAE018201</b> | MBTD1        | mbt domain containing 1                                                       | -0.12 |
| <b>HSAE002138</b> | SS18         | synovial sarcoma translocation, chromosome 18                                 | 0.03  |
| <b>HSAE027412</b> | DST          | dystonin                                                                      | 0.06  |
| <b>HSAE015476</b> | PTGIS        | prostaglandin I2 (prostacyclin) synthase                                      | 0.19  |
| <b>HSAE011055</b> | OGN          | osteoglycin                                                                   | 0.19  |
| <b>HSAE020336</b> | FAM122B      | family with sequence similarity 122B                                          | -0.22 |
| <b>HSAE015317</b> | TMEM168      | transmembrane protein 168                                                     | -0.14 |
| <b>HSAE004016</b> | USP15        | ubiquitin specific peptidase 15                                               | -0.16 |
| <b>HSAE006357</b> | MNAT1        | menage a trois homolog 1, cyclin H assembly factor (Xenopus laevis)           | -0.10 |
| <b>HSAE000600</b> | TES          | testis derived transcript (3 LIM domains)                                     | -0.03 |
| <b>HSAE000934</b> | TOM1L1       | target of myb1 (chicken)-like 1                                               | -0.05 |
| <b>HSAE011421</b> | PBX4         | pre-B-cell leukemia homeobox 4                                                | -0.08 |
| <b>HSAE014003</b> | CBX1         | chromobox homolog 1                                                           | -0.14 |
| <b>HSAE001338</b> | TNFRSF25     | tumor necrosis factor receptor superfamily, member 25                         | -0.16 |
| <b>HSAE014032</b> | C1orf174     | chromosome 1 open reading frame 174                                           | -0.06 |
| <b>HSAE019250</b> | MDH1B        | malate dehydrogenase 1B, NAD (soluble)                                        | -0.18 |
| <b>HSAE011842</b> | MAPKAPK5-AS1 | MAPKAPK5 antisense RNA 1                                                      | -0.06 |
| <b>HSAE001836</b> | EIF2AK3      | eukaryotic translation initiation factor 2-alpha kinase 3                     | -0.09 |
| <b>HSAE013221</b> | ZC3H4        | zinc finger CCCH-type containing 4                                            | -0.10 |
| <b>HSAE010205</b> | FAM208A      | family with sequence similarity 208, member A                                 | -0.08 |
| <b>HSAE021043</b> | PSME4        | proteasome (prosome, macropain) activator subunit 4                           | -0.14 |
| <b>HSAE013883</b> | SLC1A3       | solute carrier family 1 (glial high affinity glutamate transporter), member 3 | -0.14 |
| <b>HSAE002020</b> | DUSP6        | dual specificity phosphatase 6                                                | -0.19 |
| <b>HSAE003248</b> | ACYP1        | acylphosphatase 1, erythrocyte (common) type                                  | -0.12 |
| <b>HSAE011498</b> | QTRTD1       | queuine tRNA-ribosyltransferase domain containing 1                           | -0.08 |
| <b>HSAE018659</b> | ETV6         | ets variant 6                                                                 | -0.10 |

|                   |               |                                                                                              |       |
|-------------------|---------------|----------------------------------------------------------------------------------------------|-------|
| <b>HSAE001585</b> | ORC4          | origin recognition complex, subunit 4                                                        | -0.10 |
| <b>HSAE022833</b> | CCDC170       | coiled-coil domain containing 170                                                            | -0.25 |
| <b>HSAE003644</b> | GPN1          | GPN-loop GTPase 1                                                                            | -0.08 |
| <b>HSAE004788</b> | NGLY1         | N-glycanase 1                                                                                | -0.11 |
| <b>HSAE010725</b> | MOK           | MOK protein kinase                                                                           | -0.11 |
| <b>HSAE005403</b> | SNX14         | sorting nexin 14                                                                             | -0.13 |
| <b>HSAE004343</b> | SYCP2         | synaptonemal complex protein 2                                                               | -0.15 |
| <b>HSAE002779</b> | ZNF492        | zinc finger protein 492                                                                      | -0.10 |
| <b>HSAE018198</b> | KIAA1377      | KIAA1377                                                                                     | -0.15 |
| <b>HSAE002663</b> | ISCA2         | iron-sulfur cluster assembly 2 homolog (S. cerevisiae)                                       | -0.07 |
| <b>HSAE029538</b> | DTNA          | dystrobrevin, alpha                                                                          | 0.15  |
| <b>HSAE015424</b> | LRRC10B       | leucine rich repeat containing 10B                                                           | -0.18 |
| <b>HSAE014744</b> | LRRC14        | leucine rich repeat containing 14                                                            | -0.14 |
| <b>HSAE005719</b> | ERBB2IP       | erbb2 interacting protein                                                                    | -0.12 |
| <b>HSAE008692</b> | ZYG11B        | zyg-11 homolog B (C. elegans)                                                                | -0.10 |
| <b>HSAE020721</b> | DGKZ          | diacylglycerol kinase, zeta                                                                  | -0.09 |
| <b>HSAE016618</b> | ZNF425        | zinc finger protein 425                                                                      | -0.05 |
| <b>HSAE001849</b> | TMEM68        | transmembrane protein 68                                                                     | -0.05 |
| <b>HSAE016437</b> | RP11-686D22.8 | RP11-686D22.8                                                                                | -0.11 |
| <b>HSAE004102</b> | FAM166B       | family with sequence similarity 166, member B                                                | -0.07 |
| <b>HSAE001830</b> | BTC           | betacellulin                                                                                 | -0.06 |
| <b>HSAE008612</b> | WDR63         | WD repeat domain 63                                                                          | -0.12 |
| <b>HSAE014596</b> | FAM71E2       | family with sequence similarity 71, member E2                                                | 0.12  |
| <b>HSAE000694</b> | MRPL45        | mitochondrial ribosomal protein L45                                                          | -0.05 |
| <b>HSAE019606</b> | LINC00476     | long intergenic non-protein coding RNA 476                                                   | -0.11 |
| <b>HSAE001712</b> | KLHL3         | kelch-like 3 (Drosophila)                                                                    | -0.15 |
| <b>HSAE000571</b> | HSPA1A        | heat shock 70kDa protein 1A                                                                  | -0.16 |
| <b>HSAE009957</b> | CCDC71        | coiled-coil domain containing 71                                                             | -0.04 |
| <b>HSAE024874</b> | HOXC4         | homeobox C4                                                                                  | -0.13 |
| <b>HSAE007783</b> | PRRG3         | proline rich Gla (G-carboxyglutamic acid) 3 (transmembrane)                                  | 0.15  |
| <b>HSAE003836</b> | PIK3C2B       | phosphatidylinositol-4-phosphate 3-kinase, catalytic subunit type 2 beta                     | -0.17 |
| <b>HSAE017699</b> | PRDM10        | PR domain containing 10                                                                      | -0.12 |
| <b>HSAE033212</b> | Unknown       | Unknown                                                                                      | -0.22 |
| <b>HSAE029507</b> | TUG1          | taurine upregulated 1 (non-protein coding)                                                   | -0.16 |
| <b>HSAE005634</b> | H1F0          | H1 histone family, member 0                                                                  | 0.32  |
| <b>HSAE018292</b> | TRIM59        | tripartite motif containing 59                                                               | -0.21 |
| <b>HSAE004297</b> | ARMC9         | armadillo repeat containing 9                                                                | -0.17 |
| <b>HSAE029390</b> | MAGI3         | membrane associated guanylate kinase, WW and PDZ domain containing 3                         | -0.13 |
| <b>HSAE002178</b> | WBP7          | Histone-lysine N-methyltransferase MLL4                                                      | 0.07  |
| <b>HSAE018961</b> | PDSS2         | prenyl (decaprenyl) diphosphate synthase, subunit 2                                          | -0.03 |
| <b>HSAE010367</b> | NDUFB4        | NADH dehydrogenase (ubiquinone) 1 beta subcomplex, 4, 15kDa                                  | -0.05 |
| <b>HSAE001227</b> | ZNF718        | zinc finger protein 718                                                                      | -0.06 |
| <b>HSAE012481</b> | TMX2          | thioredoxin-related transmembrane protein 2                                                  | 0.07  |
| <b>HSAE013709</b> | PLEKHA1       | pleckstrin homology domain containing, family A (phosphoinositide binding specific) member 1 | -0.08 |
| <b>HSAE001201</b> | TDRD7         | tudor domain containing 7                                                                    | -0.06 |
| <b>HSAE005355</b> | CDKN2AIP      | CDKN2A interacting protein                                                                   | -0.14 |
| <b>HSAE032816</b> | KLHL17        | kelch-like 17 (Drosophila)                                                                   | -0.10 |
| <b>HSAE012522</b> | EBF1          | early B-cell factor 1                                                                        | 0.04  |
| <b>HSAE022046</b> | NOTCH2        | notch 2                                                                                      | 0.12  |
| <b>HSAE030479</b> | OR52I1        | olfactory receptor, family 52, subfamily I, member 1                                         | 0.08  |
| <b>HSAE010170</b> | DIS3L         | DIS3 mitotic control homolog (S. cerevisiae)-like                                            | -0.05 |
| <b>HSAE019411</b> | RP11-689P11.2 | RP11-689P11.2                                                                                | -0.12 |
| <b>HSAE030182</b> | FAM201A       | family with sequence similarity 201, member A                                                | -0.07 |
| <b>HSAE017450</b> | DPY19L4       | dpy-19-like 4 (C. elegans)                                                                   | -0.12 |
| <b>HSAE021251</b> | XIAP          | X-linked inhibitor of apoptosis                                                              | -0.11 |
| <b>HSAE027237</b> | ALDH3A2       | aldehyde dehydrogenase 3 family, member A2                                                   | -0.17 |

|                   |           |                                                                                            |       |
|-------------------|-----------|--------------------------------------------------------------------------------------------|-------|
| <b>HSAE012753</b> | DPY19L2P1 | dpy-19-like 2 pseudogene 1 ( <i>C. elegans</i> )                                           | -0.13 |
| <b>HSAE001450</b> | SLC39A2   | solute carrier family 39 (zinc transporter), member 2                                      | 0.06  |
| <b>HSAE017691</b> | DDX11L2   | DEAD/H (Asp-Glu-Ala-Asp/His) box polypeptide 11 like 2                                     | 0.17  |
| <b>HSAE010102</b> | PAN2      | PAN2 poly(A) specific ribonuclease subunit homolog ( <i>S. cerevisiae</i> )                | -0.12 |
| <b>HSAE030728</b> | NR5A2     | nuclear receptor subfamily 5, group A, member 2                                            | -0.13 |
| <b>HSAE007702</b> | CCDC11    | coiled-coil domain containing 11                                                           | -0.12 |
| <b>HSAE024253</b> | LUC7L3    | LUC7-like 3 ( <i>S. cerevisiae</i> )                                                       | -0.21 |
| <b>HSAE010180</b> | HES1      | hairy and enhancer of split 1, ( <i>Drosophila</i> )                                       | -0.13 |
| <b>HSAE003618</b> | TSGA10    | testis specific, 10                                                                        | -0.13 |
| <b>HSAE014580</b> | POM121C   | POM121 transmembrane nucleoporin C                                                         | 0.02  |
| <b>HSAE006626</b> | NUP62CL   | nucleoporin 62kDa C-terminal like                                                          | -0.16 |
| <b>HSAE001620</b> | EXT2      | exostosin 2                                                                                | -0.13 |
| <b>HSAE009603</b> | GDE1      | glycerophosphodiester phosphodiesterase 1                                                  | -0.08 |
| <b>HSAE024589</b> | NDUFB5    | NADH dehydrogenase (ubiquinone) 1 beta subcomplex, 5, 16kDa                                | -0.12 |
| <b>HSAE010188</b> | TSC2      | tuberous sclerosis 2                                                                       | 0.13  |
| <b>HSAE016743</b> | PRPF38A   | PRP38 pre-mRNA processing factor 38 (yeast) domain containing A                            | -0.10 |
| <b>HSAE032880</b> | ZNF730    | Zinc finger protein 730                                                                    | -0.21 |
| <b>HSAE009304</b> | B3GNT2    | UDP-GlcNAc:betaGal beta-1,3-N-acetylglucosaminyltransferase 2                              | -0.04 |
| <b>HSAE005110</b> | SLC2A8    | solute carrier family 2 (facilitated glucose transporter), member 8                        | 0.10  |
| <b>HSAE023646</b> | TMEM204   | transmembrane protein 204                                                                  | 0.12  |
| <b>HSAE008410</b> | SHISA3    | shisa homolog 3 ( <i>Xenopus laevis</i> )                                                  | 0.23  |
| <b>HSAE017269</b> | TRAF3IP1  | TNF receptor-associated factor 3 interacting protein 1                                     | -0.08 |
| <b>HSAE006817</b> | FZD3      | frizzled family receptor 3                                                                 | -0.18 |
| <b>HSAE001956</b> | COMMD3    | COMM domain containing 3                                                                   | -0.10 |
| <b>HSAE005511</b> | LPAR6     | lysophosphatidic acid receptor 6                                                           | -0.16 |
| <b>HSAE019557</b> | CD276     | CD276 molecule                                                                             | -0.08 |
| <b>HSAE011219</b> | DMTF1     | cyclin D binding myb-like transcription factor 1                                           | -0.14 |
| <b>HSAE019844</b> | OGT       | O-linked N-acetylglucosamine (GlcNAc) transferase                                          | -0.21 |
| <b>HSAE007934</b> | CNOT7     | CCR4-NOT transcription complex, subunit 7                                                  | -0.11 |
| <b>HSAE020945</b> | SLC7A11   | solute carrier family 7 (anionic amino acid transporter light chain, xc-system), member 11 | -0.21 |
| <b>HSAE030082</b> | HLA-B     | major histocompatibility complex, class I, B                                               | -0.27 |
| <b>HSAE017421</b> | Unknown   | Unknown                                                                                    | -0.07 |
| <b>HSAE025366</b> | CC2D2A    | coiled-coil and C2 domain containing 2A                                                    | -0.18 |
| <b>HSAE003728</b> | CLGN      | calmegin                                                                                   | -0.21 |
| <b>HSAE014978</b> | NANOS1    | nanos homolog 1 ( <i>Drosophila</i> )                                                      | -0.07 |
| <b>HSAE024968</b> | GPR133    | G protein-coupled receptor 133                                                             | 0.08  |
| <b>HSAE001491</b> | TSNAXIP1  | translin-associated factor X interacting protein 1                                         | -0.14 |
| <b>HSAE010427</b> | HSPA1L    | heat shock 70kDa protein 1-like                                                            | -0.06 |
| <b>HSAE023884</b> | GRN       | granulin                                                                                   | -0.06 |
| <b>HSAE000025</b> | HMOX2     | heme oxygenase (decycling) 2                                                               | 0.08  |
| <b>HSAE005268</b> | BORA      | bora, aurora kinase A activator                                                            | -0.14 |
| <b>HSAE008114</b> | DOK5      | docking protein 5                                                                          | -0.17 |
| <b>HSAE013693</b> | DRAM2     | DNA-damage regulated autophagy modulator 2                                                 | -0.08 |
| <b>HSAE001682</b> | SLC34A2   | solute carrier family 34 (sodium phosphate), member 2                                      | 0.28  |
| <b>HSAE033332</b> | Unknown   | Unknown                                                                                    | 0.09  |
| <b>HSAE012471</b> | NONO      | non-POU domain containing, octamer-binding                                                 | -0.09 |
| <b>HSAE032360</b> | ACTBP12   | actin, beta pseudogene 12                                                                  | 0.12  |
| <b>HSAE004298</b> | ARMC9     | armadillo repeat containing 9                                                              | -0.13 |
| <b>HSAE011189</b> | DENND2D   | DENN/MADD domain containing 2D                                                             | -0.10 |
| <b>HSAE030948</b> | CAPN5     | calpain 5                                                                                  | -0.13 |
| <b>HSAE004030</b> | ANAPC5    | anaphase promoting complex subunit 5                                                       | -0.08 |
| <b>HSAE008084</b> | XPO1      | exportin 1 (CRM1 homolog, yeast)                                                           | -0.10 |
| <b>HSAE002092</b> | AMFR      | autocrine motility factor receptor, E3 ubiquitin protein ligase                            | -0.33 |
| <b>HSAE006303</b> | LSM14B    | LSM14B, SCD6 homolog B ( <i>S. cerevisiae</i> )                                            | -0.03 |
| <b>HSAE014463</b> | SRF       | serum response factor (c-fos serum response element-binding transcription factor)          | 0.06  |
| <b>HSAE001396</b> | STK33     | serine/threonine kinase 33                                                                 | -0.15 |

|                   |           |                                                                                                                                                          |       |
|-------------------|-----------|----------------------------------------------------------------------------------------------------------------------------------------------------------|-------|
| <b>HSAE017690</b> | FAM126B   | family with sequence similarity 126, member                                                                                                              | -0.14 |
| <b>HSAE020161</b> | GOLM1     | golgi membrane protein 1                                                                                                                                 | -0.05 |
| <b>HSAE002216</b> | EML4      | echinoderm microtubule associated protein like 4                                                                                                         | -0.18 |
| <b>HSAE006880</b> | REEP5     | receptor accessory protein 5                                                                                                                             | -0.07 |
| <b>HSAE007003</b> | ZNF550    | zinc finger protein 550                                                                                                                                  | -0.10 |
| <b>HSAE005704</b> | HIST2H2AC | histone cluster 2, H2ac                                                                                                                                  | -0.17 |
| <b>HSAE013304</b> | SETD4     | SET domain containing 4                                                                                                                                  | -0.09 |
| <b>HSAE001016</b> | ORMDL1    | ORM1-like 1 ( <i>S. cerevisiae</i> )                                                                                                                     | -0.11 |
| <b>HSAE012469</b> | TEF       | thyrotrophic embryonic factor                                                                                                                            | 0.03  |
| <b>HSAE023950</b> | IQCD      | IQ motif containing D                                                                                                                                    | -0.05 |
| <b>HSAE029097</b> | AMY1B     | amylase, alpha 1B (salivary)                                                                                                                             | 0.48  |
| <b>HSAE017836</b> | SPATA7    | spermatogenesis associated 7                                                                                                                             | -0.12 |
| <b>HSAE002184</b> | ILKAP     | integrin-linked kinase-associated serine/threonine phosphatase                                                                                           | -0.04 |
| <b>HSAE005751</b> | FIGNL1    | fidgetin-like 1                                                                                                                                          | -0.12 |
| <b>HSAE004529</b> | ENPP5     | ectonucleotide pyrophosphatase/phosphodiesterase 5 (putative)                                                                                            | -0.08 |
| <b>HSAE017429</b> | RICTOR    | RPTOR independent companion of MTOR, complex 2                                                                                                           | -0.13 |
| <b>HSAE005562</b> | ZNF558    | zinc finger protein 558                                                                                                                                  | -0.11 |
| <b>HSAE027741</b> | ZNF813    | zinc finger protein 813                                                                                                                                  | -0.03 |
| <b>HSAE010738</b> | SIX1      | SIX homeobox 1                                                                                                                                           | -0.08 |
| <b>HSAE012506</b> | ZBTB49    | zinc finger and BTB domain containing 49                                                                                                                 | -0.10 |
| <b>HSAE033552</b> | CROCC     | ciliary rootlet coiled-coil, rootletin                                                                                                                   | -0.12 |
| <b>HSAE032557</b> | SLC3A1    | solute carrier family 3 (cystine, dibasic and neutral amino acid transporters, activator of cystine, dibasic and neutral amino acid transport), member 1 | -0.06 |
| <b>HSAE021990</b> | RNPEP     | arginyl aminopeptidase (aminopeptidase B)                                                                                                                | -0.07 |
| <b>HSAE032660</b> | NPB       | neuropeptide B                                                                                                                                           | -0.08 |
| <b>HSAE000414</b> | ATP5SL    | ATP5S-like                                                                                                                                               | -0.04 |
| <b>HSAE014170</b> | HLA-G     | major histocompatibility complex, class I, G                                                                                                             | -0.18 |
| <b>HSAE032969</b> | HLA-C     | major histocompatibility complex, class I, C                                                                                                             | -0.19 |
| <b>HSAE016907</b> | RBM43     | RNA binding motif protein 43                                                                                                                             | -0.12 |
| <b>HSAE021891</b> | ZNF83     | zinc finger protein 83                                                                                                                                   | -0.14 |
| <b>HSAE008338</b> | PIBF1     | progesterone immunomodulatory binding factor 1                                                                                                           | -0.09 |
| <b>HSAE003626</b> | TSPAN6    | tetraspanin 6                                                                                                                                            | -0.18 |
| <b>HSAE013158</b> | SPAG6     | sperm associated antigen 6                                                                                                                               | -0.26 |
| <b>HSAE024786</b> | SRRT      | serrate RNA effector molecule homolog ( <i>Arabidopsis</i> )                                                                                             | -0.08 |
| <b>HSAE027749</b> | ACTL9     | actin-like 9                                                                                                                                             | 0.07  |
| <b>HSAE002971</b> | VWC2      | von Willebrand factor C domain containing 2                                                                                                              | -0.23 |
| <b>HSAE002682</b> | EFTUD1    | elongation factor Tu GTP binding domain containing 1                                                                                                     | -0.06 |
| <b>HSAE026502</b> | TRIOBP    | TRIO and F-actin binding protein                                                                                                                         | 0.07  |
| <b>HSAE009253</b> | NLRP5     | NLR family, pyrin domain containing 5                                                                                                                    | 0.15  |
| <b>HSAE000440</b> | STK16     | serine/threonine kinase 16                                                                                                                               | 0.06  |
| <b>HSAE007450</b> | ABCD4     | ATP-binding cassette, sub-family D (ALD), member 4                                                                                                       | -0.12 |
| <b>HSAE004543</b> | ZNF323    | zinc finger protein 323                                                                                                                                  | -0.15 |
| <b>HSAE006633</b> | TAS2R40   | taste receptor, type 2, member 40                                                                                                                        | 0.27  |
| <b>HSAE017069</b> | NTRK3     | neurotrophic tyrosine kinase, receptor, type 3                                                                                                           | 0.22  |
| <b>HSAE012776</b> | SDCCAG8   | serologically defined colon cancer antigen 8                                                                                                             | -0.02 |
| <b>HSAE013790</b> | HLTF      | helicase-like transcription factor                                                                                                                       | -0.19 |
| <b>HSAE011512</b> | MBD4      | methyl-CpG binding domain protein 4                                                                                                                      | -0.07 |
| <b>HSAE006537</b> | ZNF721    | zinc finger protein 721                                                                                                                                  | -0.08 |
| <b>HSAE014584</b> | CCDC30    | coiled-coil domain containing 30                                                                                                                         | -0.10 |
| <b>HSAE010374</b> | FAT1      | FAT tumor suppressor homolog 1 ( <i>Drosophila</i> )                                                                                                     | -0.11 |
| <b>HSAE024319</b> | CDKN2C    | cyclin-dependent kinase inhibitor 2C (p18, inhibits CDK4)                                                                                                | -0.22 |
| <b>HSAE006041</b> | ZDHHC17   | zinc finger, DHHC-type containing 17                                                                                                                     | -0.18 |
| <b>HSAE025704</b> | CCDC34    | coiled-coil domain containing 34                                                                                                                         | -0.19 |
| <b>HSAE007323</b> | CEP290    | centrosomal protein 290kDa                                                                                                                               | -0.15 |
| <b>HSAE027046</b> | UBE2Q2    | ubiquitin-conjugating enzyme E2Q family member 2                                                                                                         | -0.13 |
| <b>HSAE012714</b> | UBA52     | ubiquitin A-52 residue ribosomal protein fusion product 1                                                                                                | 0.06  |
| <b>HSAE003564</b> | CDK9      | cyclin-dependent kinase 9                                                                                                                                | -0.07 |



|                   |           |                                                                                                        |       |
|-------------------|-----------|--------------------------------------------------------------------------------------------------------|-------|
| <b>HSAE026293</b> | Unknown   | Unknown                                                                                                | 0.08  |
| <b>HSAE010971</b> | ADH1C     | alcohol dehydrogenase 1C (class I), gamma polypeptide                                                  | 0.05  |
| <b>HSAE000034</b> | SERPINF1  | serpin peptidase inhibitor, clade F (alpha-2 antiplasmin, pigment epithelium derived factor), member 1 | 0.19  |
| <b>HSAE031007</b> | GRIN3B    | glutamate receptor, ionotropic, N-methyl-D-aspartate 3B                                                | -0.14 |
| <b>HSAE004172</b> | RNFT1     | ring finger protein, transmembrane 1                                                                   | -0.10 |
| <b>HSAE011288</b> | HSPH1     | heat shock 105kDa/110kDa protein 1                                                                     | -0.19 |
| <b>HSAE018395</b> | SNHG10    | small nucleolar RNA host gene 10 (non-protein coding)                                                  | -0.12 |
| <b>HSAE017258</b> | CASK      | calcium/calmodulin-dependent serine protein kinase (MAGUK family)                                      | 0.04  |
| <b>HSAE019166</b> | PJA1      | praja ring finger 1, E3 ubiquitin protein ligase                                                       | -0.17 |
| <b>HSAE025842</b> | PTBP3     | polypyrimidine tract binding protein 3                                                                 | 0.09  |
| <b>HSAE007756</b> | PPID      | peptidylprolyl isomerase D                                                                             | 0.02  |
| <b>HSAE006495</b> | C8orf47   | chromosome 8 open reading frame 47                                                                     | -0.14 |
| <b>HSAE002475</b> | AXIN2     | axin 2                                                                                                 | -0.10 |
| <b>HSAE006190</b> | SPAG17    | sperm associated antigen 17                                                                            | -0.23 |
| <b>HSAE016684</b> | NR1D2     | nuclear receptor subfamily 1, group D, member 2                                                        | 0.12  |
| <b>HSAE002873</b> | CLDND1    | claudin domain containing 1                                                                            | 0.08  |
| <b>HSAE016637</b> | PRPF4B    | PRP4 pre-mRNA processing factor 4 homolog B (yeast)                                                    | -0.17 |
| <b>HSAE029270</b> | TMEM215   | Transmembrane protein 215                                                                              | -0.07 |
| <b>HSAE009822</b> | GOPC      | golgi-associated PDZ and coiled-coil motif containing                                                  | -0.15 |
| <b>HSAE017125</b> | PPM1D     | protein phosphatase, Mg2+/Mn2+ dependent, 1D                                                           | -0.06 |
| <b>HSAE010471</b> | WDYHV1    | WDYHV motif containing 1                                                                               | 0.17  |
| <b>HSAE009559</b> | COG6      | component of oligomeric golgi complex 6                                                                | -0.11 |
| <b>HSAE010643</b> | DCLRE1A   | DNA cross-link repair 1A                                                                               | -0.10 |
| <b>HSAE018343</b> | HNRNPA3   | heterogeneous nuclear ribonucleoprotein A3                                                             | -0.08 |
| <b>HSAE006438</b> | MNS1      | meiosis-specific nuclear structural 1                                                                  | -0.19 |
| <b>HSAE009793</b> | FIP1L1    | FIP1 like 1 ( <i>S. cerevisiae</i> )                                                                   | -0.07 |
| <b>HSAE001155</b> | PNISR     | PNN-interacting serine/arginine-rich protein                                                           | -0.12 |
| <b>HSAE000041</b> | STAT3     | signal transducer and activator of transcription 3 (acute-phase response factor)                       | 0.15  |
| <b>HSAE004908</b> | DKK1      | dickkopf 1 homolog ( <i>Xenopus laevis</i> )                                                           | 0.44  |
| <b>HSAE030313</b> | Unknown   | Unknown                                                                                                | 0.20  |
| <b>HSAE023444</b> | PNRC1     | proline-rich nuclear receptor coactivator 1                                                            | -0.11 |
| <b>HSAE005572</b> | SMAD9     | SMAD family member 9                                                                                   | 0.13  |
| <b>HSAE020054</b> | TMEM54    | transmembrane protein 54                                                                               | 0.14  |
| <b>HSAE018904</b> | CDK5RAP1  | CDK5 regulatory subunit associated protein 1                                                           | -0.07 |
| <b>HSAE016335</b> | DCP2      | DCP2 decapping enzyme homolog ( <i>S. cerevisiae</i> )                                                 | -0.13 |
| <b>HSAE024037</b> | PSMA1     | proteasome (prosome, macropain) subunit, alpha type, 1                                                 | -0.08 |
| <b>HSAE003487</b> | DLL1      | delta-like 1 ( <i>Drosophila</i> )                                                                     | 0.10  |
| <b>HSAE004236</b> | AXL       | AXL receptor tyrosine kinase                                                                           | 0.06  |
| <b>HSAE024468</b> | TOMM5     | Translocase of outer mitochondrial membrane 5 homolog (yeast)                                          | 0.06  |
| <b>HSAE021697</b> | LRR1      | leucine rich repeat protein 1                                                                          | -0.14 |
| <b>HSAE031910</b> | SEC14L1P1 | SEC14-like 1 pseudogene 1                                                                              | 0.10  |
| <b>HSAE023997</b> | DDX21     | DEAD (Asp-Glu-Ala-Asp) box helicase 21                                                                 | 0.07  |
| <b>HSAE001462</b> | EFCAB11   | EF-hand calcium binding domain 11                                                                      | -0.08 |

M, M-values were calculated as the difference between the average M-value of RIF patients and controls. Unknown, probe could not be mapped to a known gene.
